# Supplementary material for: Trends in heat and cold wave risks for the Italian Trentino-Alto Adige region from 1980 to 2018
Source: Copernicus journal article supplement (doi:10.5194/nhess-23-2593-2023), 2023-07-21
Supplement: Supplementary file 1 [file nhess-23-2593-2023-supplement.pdf]

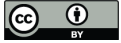

*Supplement of*

## **Trends in heat and cold wave risks for the Italian Trentino-Alto Adige region from 1980 to 2018**

**Martin Morlot et al.**

*Correspondence to:* Giuseppe Formetta ([giuseppe.formetta@unitn.it](mailto:giuseppe.formetta@unitn.it))

The copyright of individual parts of the supplement might differ from the article licence.

## Supplementary Material

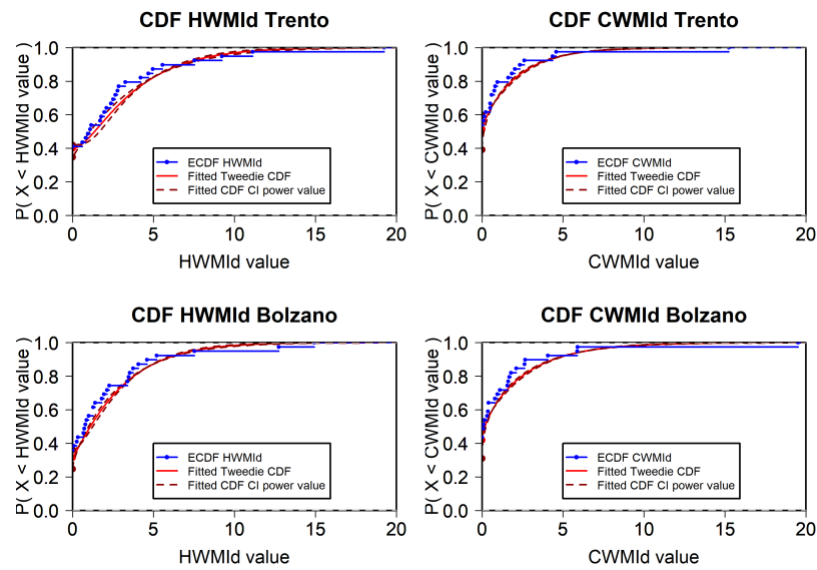

*Figure S1: Cumulative distribution functions (CDF) for both HWMId / CWMId at the location of the cities of Bolzano and Trento, displaying the probability (P) showing the empirical cumulative distributions (ECDF) for these locations as well as the confidence interval (CI) of the power value of the Tweedie distribution.*

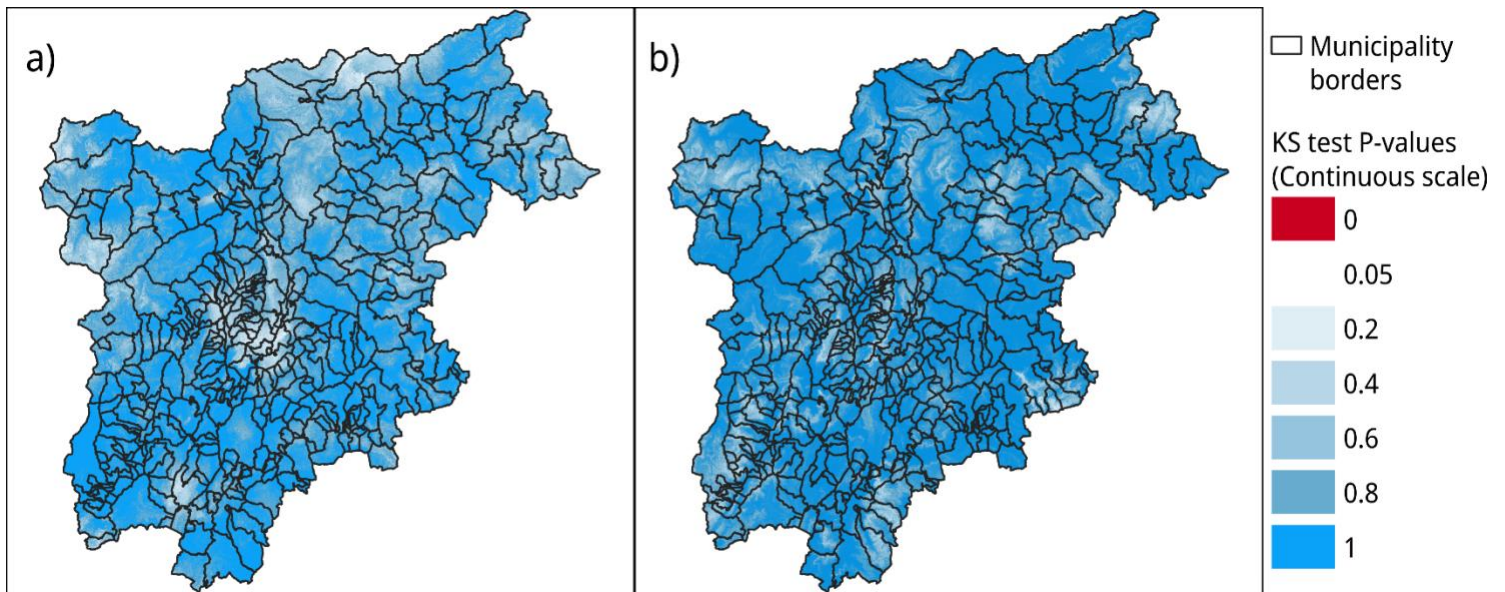

Figure S2: KS test P-values for the Tweedie distribution fitting of a) HWMId and b) CWMId with the border of the municipalities

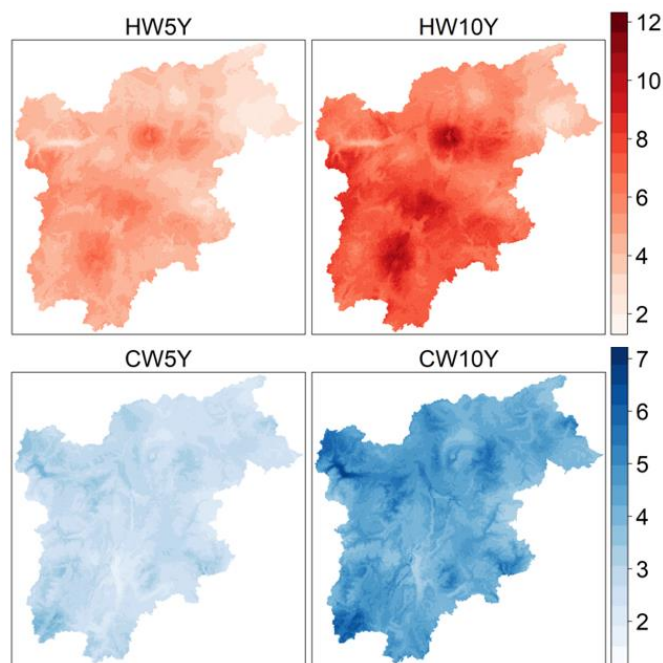

Figure S3: Heat wave and cold wave return levels corresponding to  $T=5$  years and  $T=10$  years

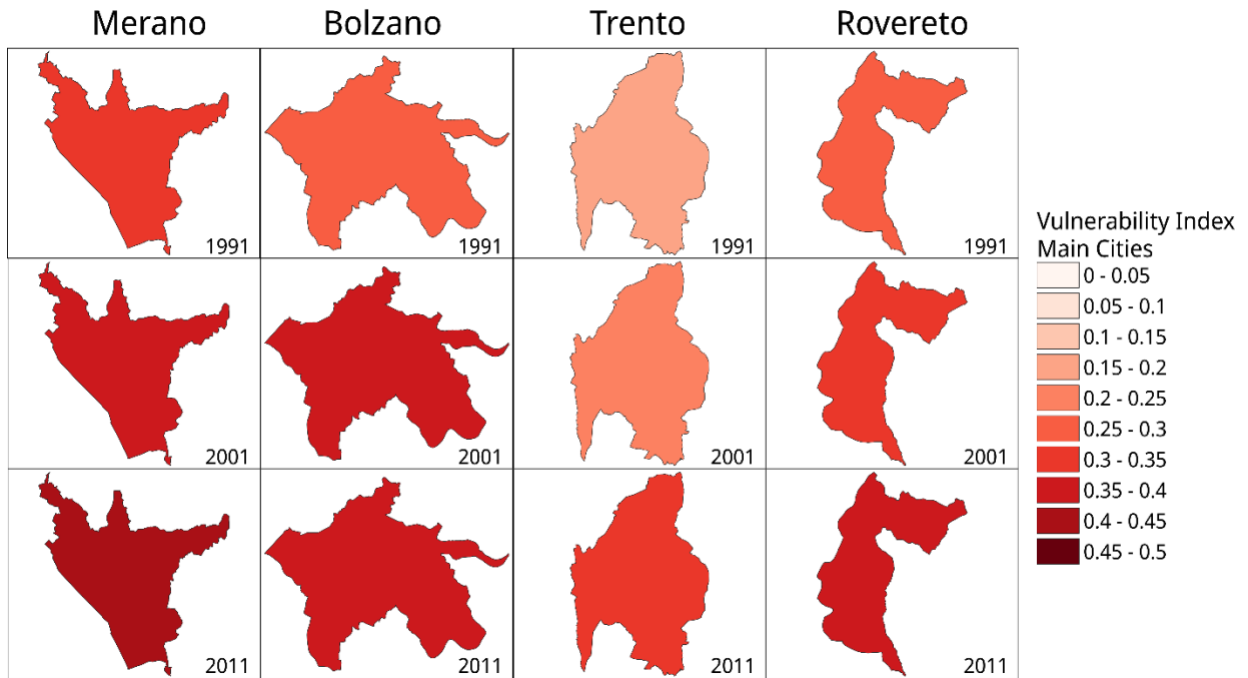

Figure S4: Evolution of the vulnerabilities of the 4 large cities of the region (Merano, Bolzano, Trento and Rovereto).

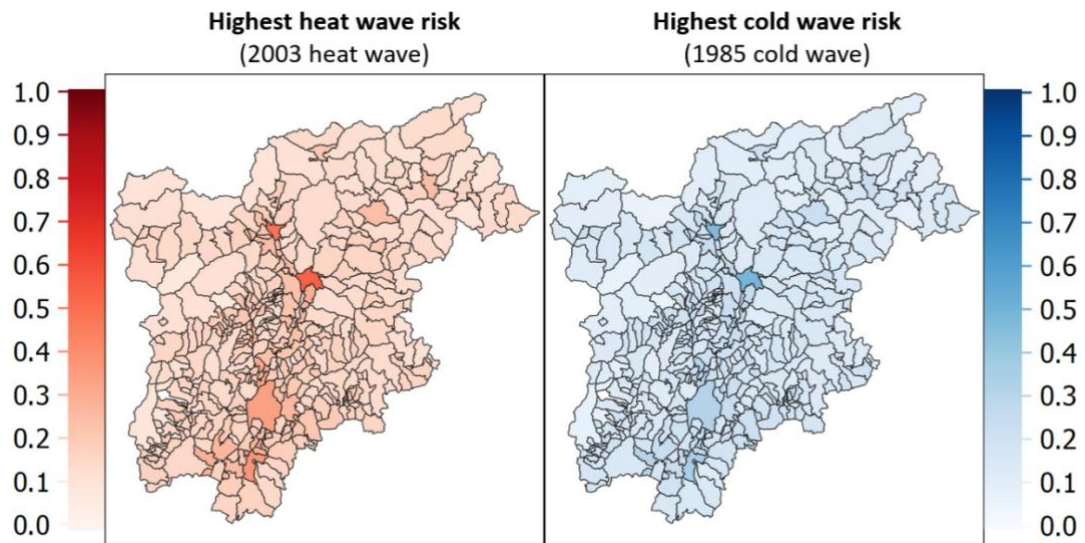

Figure S5: Years with the highest risks on record for heat waves and cold waves
